# Supplementary material for: Changes in total cholesterol level and cardiovascular disease risk among type 2 diabetes patients
Source: PubMed Central journal article supplement (PMC10205703; doi:10.1038/s41598-023-33743-6), 2023-05-23
Supplement: 41598_2023_33743_MOESM2_ESM.pdf [file 41598_2023_33743_MOESM2_ESM.pdf]

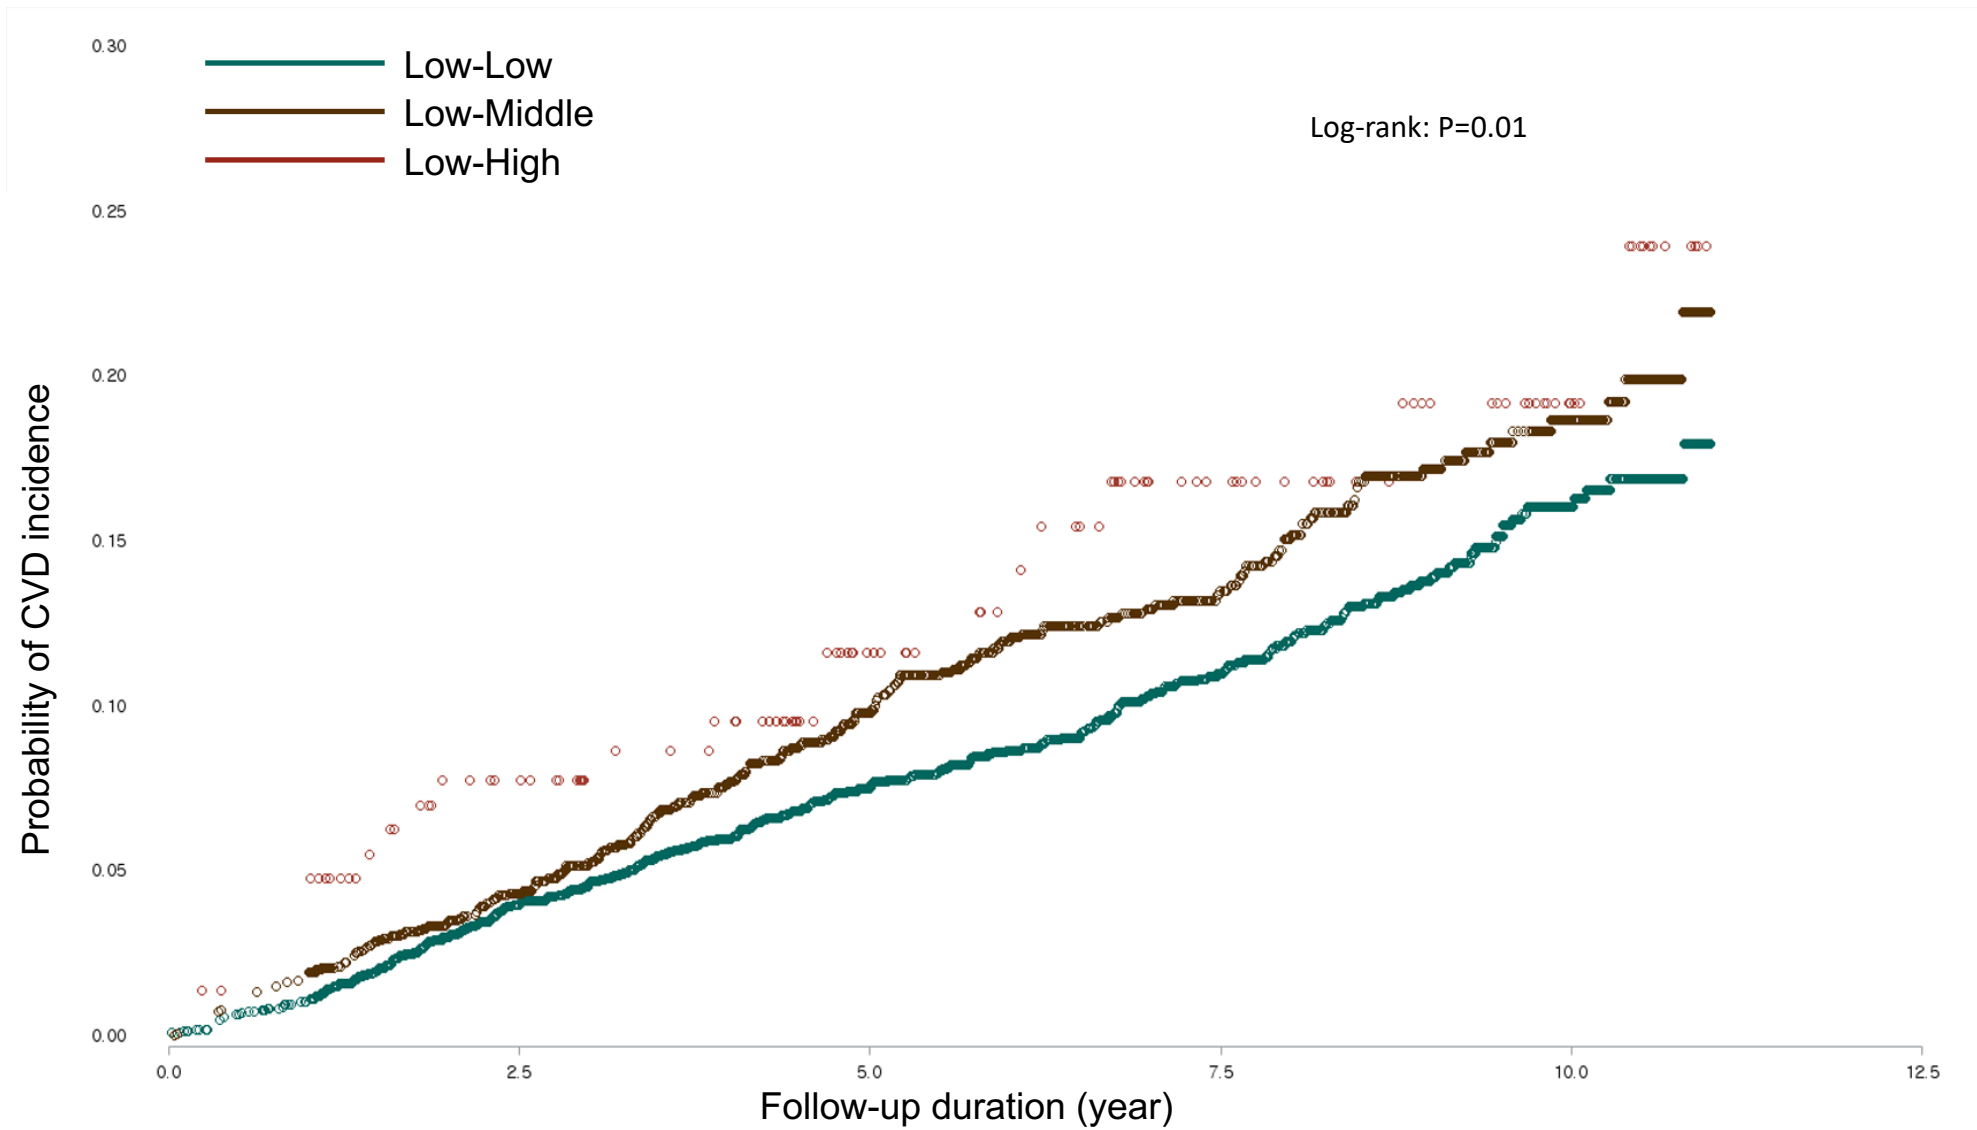

Figure Legend:  
Supplementary Figure 1. Kaplan-Meier Estimates of Cumulative Probability of CVD incidence among patients with low cholesterol levels before T2D diagnosis

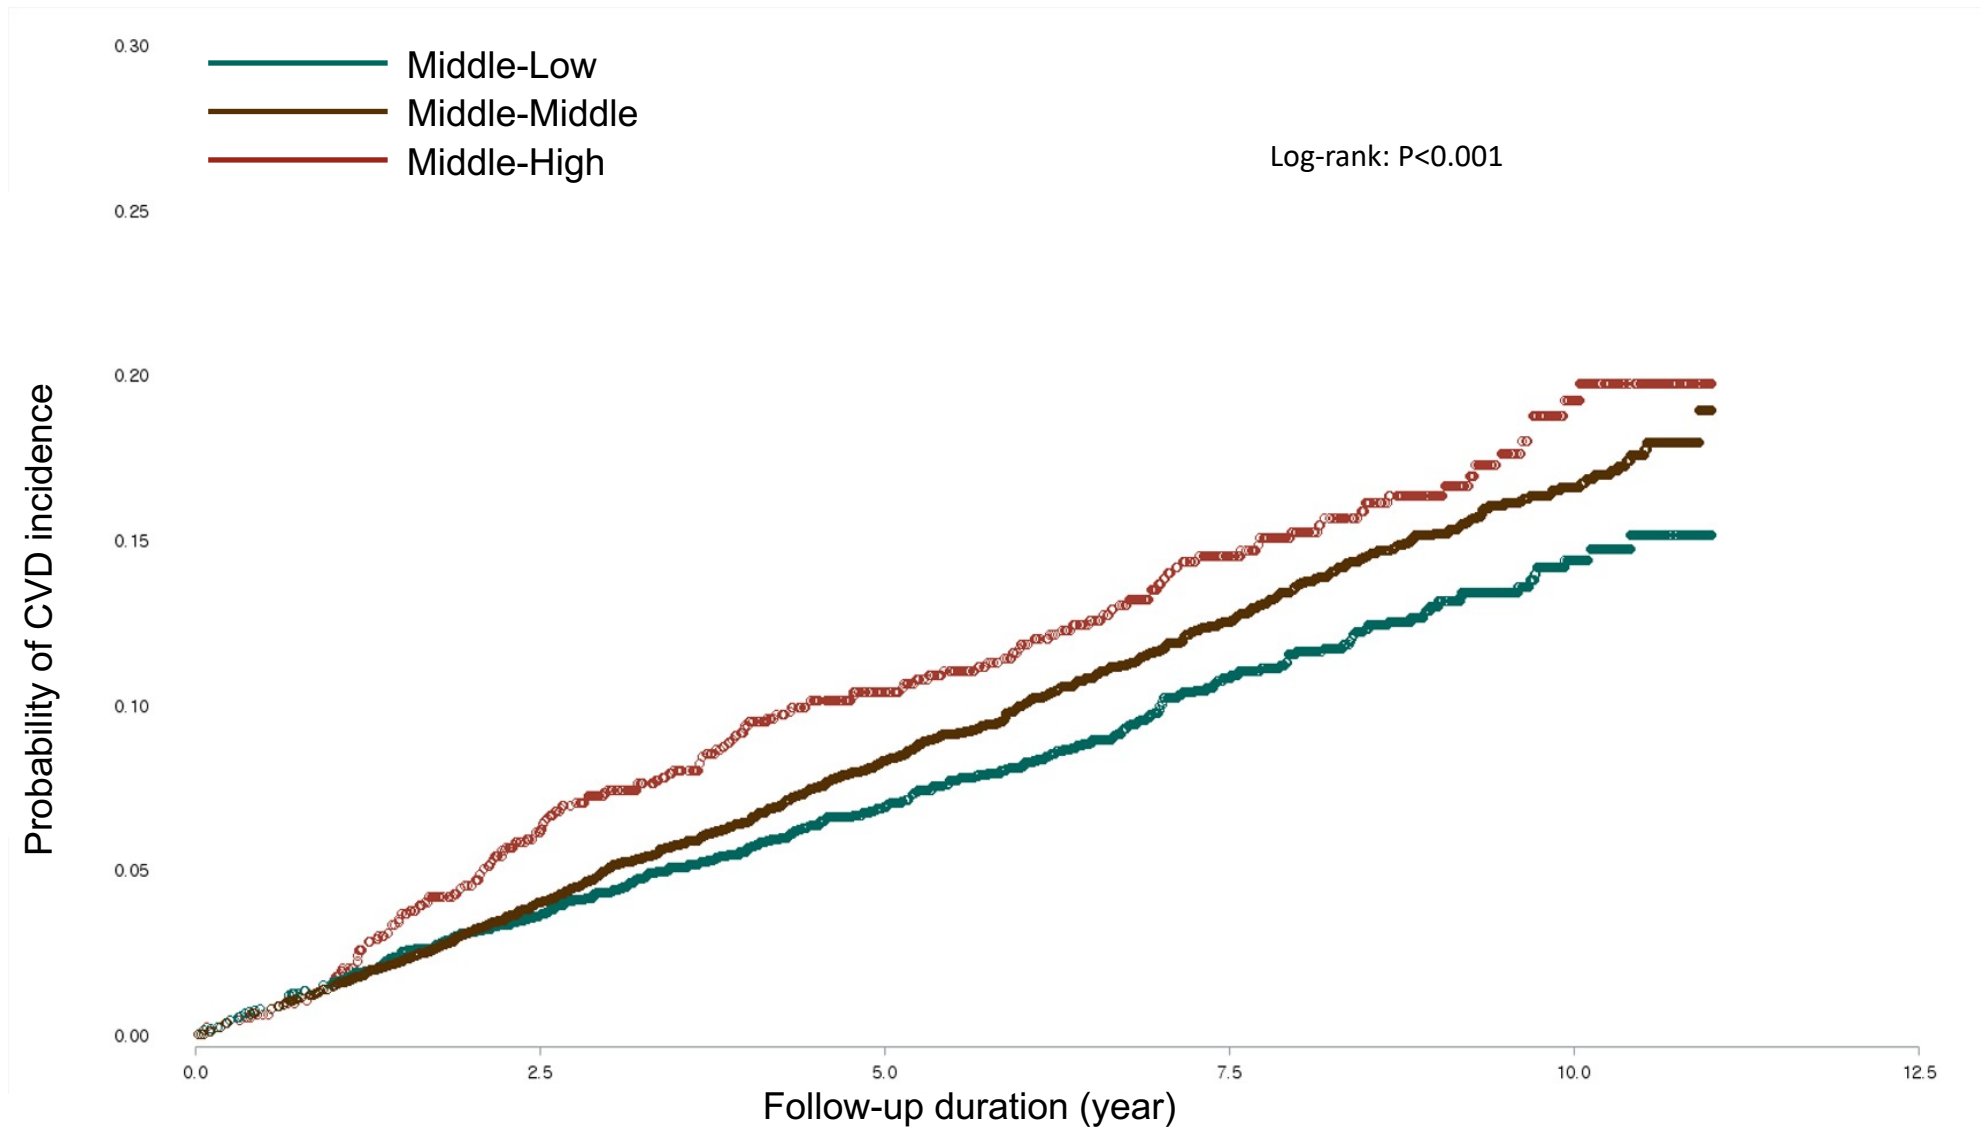

Figure Legend:  
Supplementary Figure 2. Kaplan-Meier Estimates of Cumulative Probability of CVD incidence among patients with middle cholesterol levels before T2D diagnosis

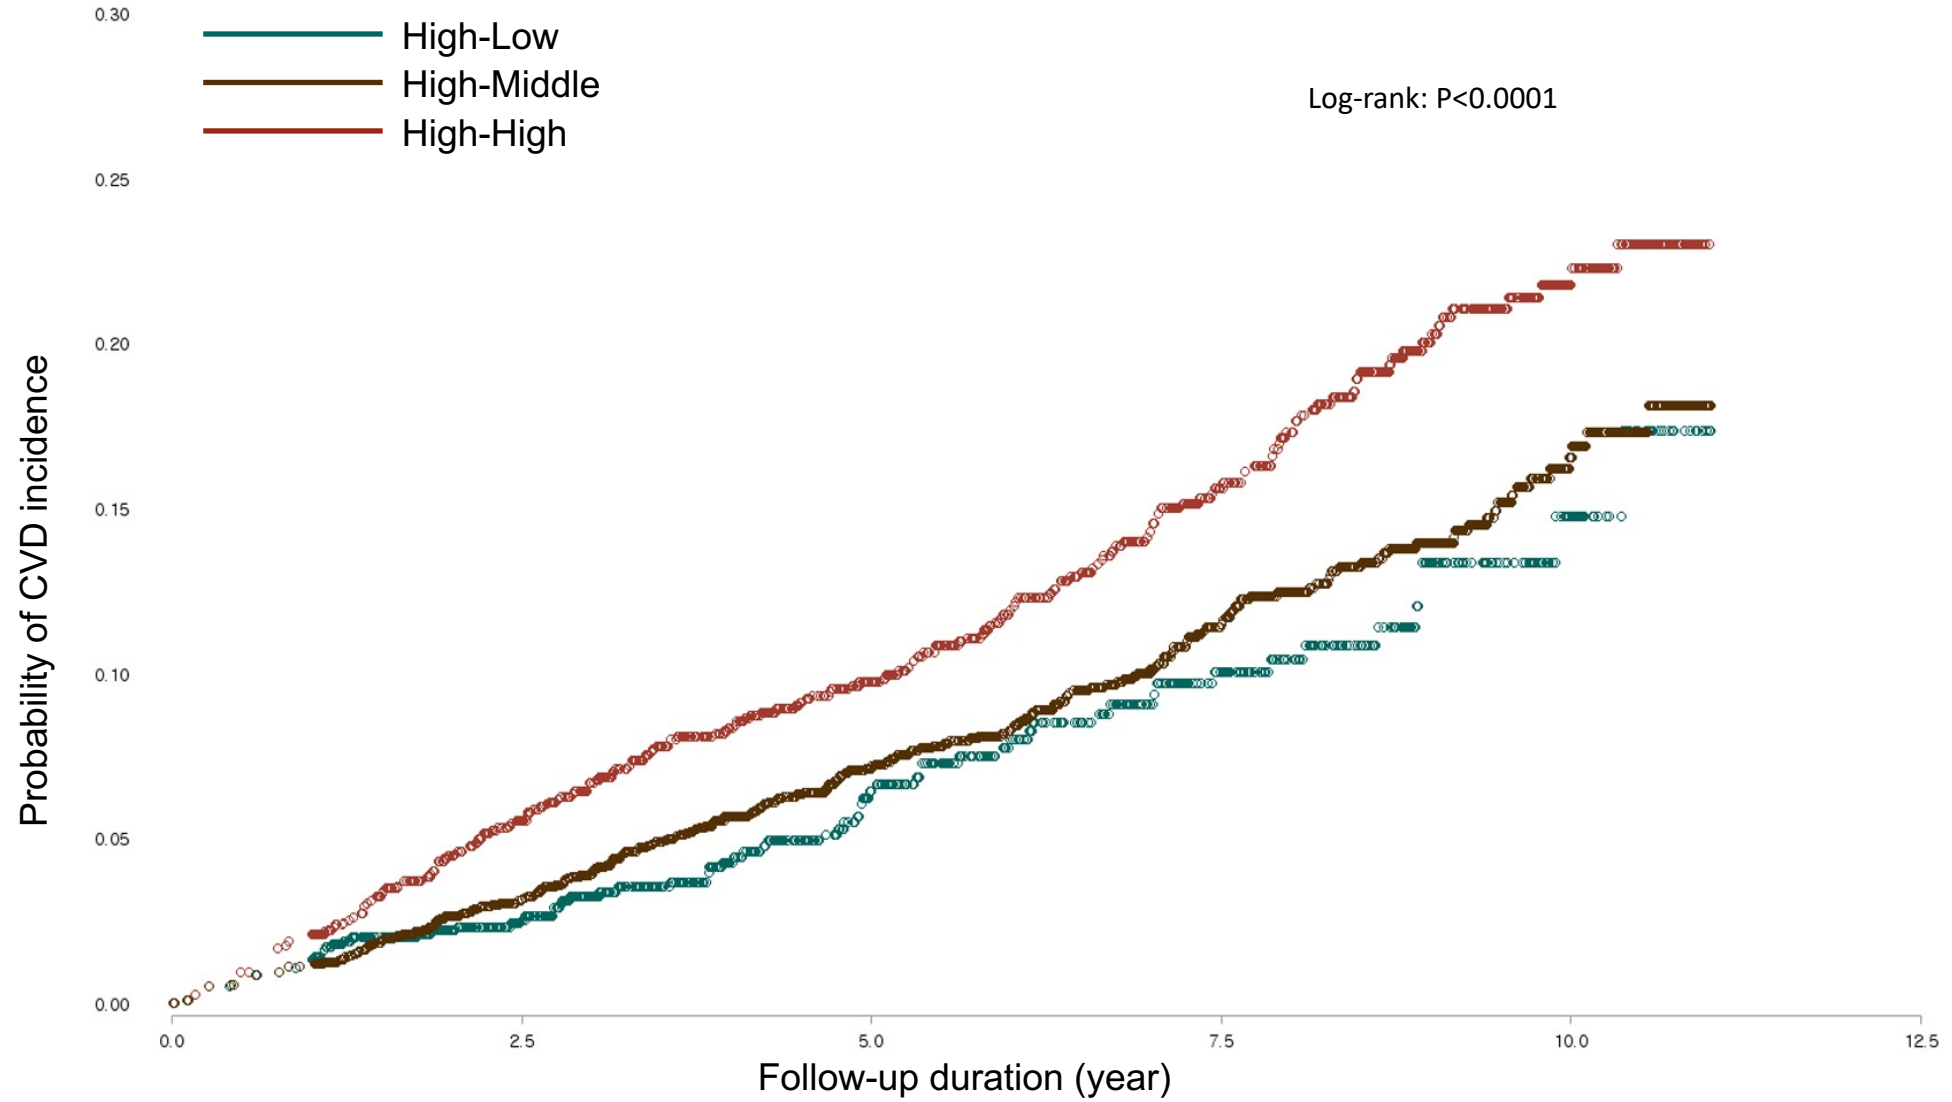

Figure Legend:  
Supplementary Figure 3. Kaplan-Meier Estimates of Cumulative Probability of CVD incidence among patients with high cholesterol levels before T2D diagnosis
